# Supplementary material for: Operative hysteroscopy versus vacuum aspiration for incomplete spontaneous abortion (HY-PER): study protocol for a randomized controlled trial
Source: Trials. 2015 Aug 19;16:363. doi: 10.1186/s13063-015-0900-1 (PMC4539935; doi:10.1186/s13063-015-0900-1)
Supplement: Additional file 5: — Follow up questionnaire of the Operative hysteroscopy versus vacuum aspiration for incomplete spontaneous abortion (HY-PER) trial. (PDF 231 kb) [file 13063_2015_900_MOESM5_ESM.pdf]

## ETUDE *Hy-Per*

Chère Mademoiselle, Chère Madame,

**Vous avez accepté de participer au protocole HYPER comparant l'efficacité de l'hystéroscopie au curetage dans le traitement chirurgical des avortements spontanés incomplets.**

Nous vous remercions d'accepter de répondre à cet auto-questionnaire.

**Les renseignements que vous nous fournissez sont confidentiels et feront l'objet d'un traitement statistique anonyme dans le cadre de l'étude HYPER.**

**Avec nos remerciements pour votre collaboration**

Nom : .....

Prénom : .....

**A quelle date répondez-vous à ce questionnaire ?**

..... / ..... / ..... 201.....

### **1<sup>ère</sup> Partie : Suivi de l'acte chirurgical :**

Avez-vous eu une complication depuis votre traitement chirurgical ?

**Non** ☐

**Oui** ☐

Si **Oui**, laquelle : .....

Avez-vous du être hospitalisée pour cette complication ?

**Non** ☐

**Oui** ☐

Si oui,

A quelle date : .....

Dans quel hôpital ou clinique : .....

Avez-vous eu une nouvelle intervention chirurgicale pour cette complication ?

**Non** ☐

**Oui** ☐

Si oui :

A quelle date : .....

Pour quel motif : .....

Dans quel hôpital ou clinique : .....

Quel est le nom du médecin : .....

Pouvez-vous préciser l'intervention :

- ☐ - Hystéroscopieopératoire
- ☐ - Curetage
- ☐ - Coelioscopie
- ☐ - Laparotomie
- ☐ - Embolisation en radiologie interventionnelle

Avez-vous eu une hystéroscopie diagnostique depuis votre intervention ?

**Non** ☐

**Oui** ☐

Si **oui**, était-elle normale ?

**Non** ☐

**Oui** ☐

Si **non**, quelle anomalie était-elle présente ? .....

Savez-vous actuellement dans quel bras de l'étude vous étiez, c'est-à-dire quel traitement vous avez reçu, entre l'hystéroscopie et le curetage aspiratif, lors de votre prise en charge initiale ?

☐ Je ne sais pas

☐ Je pense avoir reçu l'hystéroscopie

☐ Je pense avoir reçu le curetage aspiratif

## **2eme Partie : Désir de grossesse.**

Etes-vous actuellement enceinte ?

**Non** ☐

**Oui** ☐

Si Oui :

Quelle est la date estimée du début de grossesse ? ..... / ..... / ...201.....

Elle a été estimée par

☐ La date de vos dernières règles

☐ Echographie

Si non :

Essayez-vous actuellement- d'être enceinte ?

**Non** ☐

**Oui** ☐

Si Oui :

Depuis quelle date ?..... / ..... / ...201.....

Avez-vous actuellement des rapports sexuels dans le but d'obtenir une grossesse ?

**Non** ☐

**Oui** ☐

Etes-vous actuellement en procédure d'Assistance Médicale à la Procréation ?

**Non** ☐

**Oui** ☐

Si oui,

Depuis quelle date..... / ..... / ...201.....

Quelle méthode est utilisée ?:

☐ Stimulation simple

☐ Insémination intra utérine (IIU)

☐ Fécondation in-vitro (FIV)

☐ Autre, précisez : .....

Utilisez-vous actuellement une **méthode contraceptive** ?

**Non** ☐

**Oui** ☐

Si **OUI** :

Veuillez préciser le jour de début de contraception

..... /...../...201.....

Quelle méthode utilisez-vous ?

☐ Une pilule

Si vous UTILISEZ ACTUELLEMENT une pilule contraceptive, précisez le **nom du produit** :.....

☐ Un stérilet

Si vous UTILISEZ ACTUELLEMENT un stérilet, précisez le **nom du produit** : .....  
.....

☐ Un implant sous cutané

☐ Autre : détaillez :

Avez-vous été enceinte depuis l'intervention chirurgicale ?

**Non** ☐

**Oui** ☐

Si **Oui** :

Quelle a été la date estimée du début de grossesse ?..... /...../...201.....

Elle a été estimée

☐ Par la date de vos dernières règles

☐ Par échographie

Quelle a été la date de la fin de cette grossesse ?..... /...../...201.....

S'agissait-il d'une Grossesse

☐ Simple

☐ Gémellaire

☐ 3 ou plus

L'issue de cette grossesse était :

☐ Accouchement

☐ FCS (fausse couche spontanée précoce ou tardive)

☐ GEU (grossesse extra utérine)

☐ IVG (interruption volontaire de grossesse)

Autre :

En cas d'accouchement pourriez-vous préciser

L'hôpital ou la clinique où vous avez accouché : .....

La date de l'accouchement : .....

Le nombre d'enfant : .....

En cas d'accouchement pourriez-vous préciser la méthode

☐ Accouchement par les voies naturelles

☐ Césarienne

Toujours en cas d'accouchement, avez-vous eu des pathologies pendant la grossesse ?

☐ Non

☐ Oui

Si **Oui** :

☐ Menace d'accouchement prématuré

☐ Retard de croissance intra-utérin

☐ Hémorragie de la délivrance

☐ Autre : détaillez

Avez-vous eu un problème pour l'évacuation du placenta après l'accouchement ?

☐ Non

☐ Oui

Si **Oui**, précisez : .....

En vous remerciant.

L'équipe de l'étude HYPER
